# Supplementary material
Source: PubMed Central journal article supplement (PMC2528834)
Supplement: NIHMS60791-supplement-si20050617_101.pdf [file NIHMS60791-supplement-si20050617_101.pdf]

## Supporting Information

### Design and Synthesis of New Alkenyldiarylmethane (ADAM) HIV-1 Non-Nucleoside Reverse Transcriptase Inhibitors (NNRTIs)

Bo-Liang Deng,<sup>†</sup> Tracy L. Hartman,<sup>‡</sup> Robert W. Buckheit, Jr.,<sup>‡</sup> Christophe Pannecouque,<sup>§</sup>  
Erik De Clercq,<sup>§</sup> Phillip E. Fanwick,<sup>§</sup> and Mark Cushman<sup>†,\*</sup>

|                                                                    |     |
|--------------------------------------------------------------------|-----|
| Elemental analysis data                                            | S1  |
| <b>Figure 1</b> Structural Diagram of Compound <b>22</b>           | S4  |
| <b>Crystal Data and Data Collection Parameters for Compound 22</b> | S4  |
| <b>Crystallographic Data for Compound 22</b>                       | S6  |
| <b>Table 2.</b> Bond Distances in Angstroms for Compound <b>22</b> | S7  |
| <b>Table 3.</b> Bond Angles in Degrees for Compound <b>22</b>      | S8  |
| <b>Figure 2</b> Structural Diagram of Compound <b>58</b>           | S9  |
| <b>Crystallographic Data for Compound 58</b>                       | S9  |
| <b>Table 4.</b> Bond Angles in Degrees for Compound <b>58</b>      | S10 |
| <b>Table 5.</b> Bond Distances in Angstroms for Compound <b>58</b> | S11 |

## Elemental analysis data

| Code      | Found |      |      |        |       | Calculated |      |       |        |       |
|-----------|-------|------|------|--------|-------|------------|------|-------|--------|-------|
|           | C     | H    | N    | Sn(Cl) | I(F)  | C          | H    | N     | Sn(Cl) | I(F)  |
| <b>3</b>  | 65.58 | 6.39 | 2.71 |        |       | 65.92      | 6.42 | 3.08  |        |       |
| <b>4</b>  | 66.11 | 6.51 | 3.18 |        |       | 65.92      | 6.42 | 3.08  |        |       |
| <b>7</b>  | 59.65 | 5.03 | 3.15 |        | 15.65 | 59.87      | 4.82 | 2.91  |        | 15.78 |
| <b>8</b>  | 59.75 | 4.97 | 3.14 |        | 17.02 | 60.14      | 4.82 | 3.19  |        | 17.29 |
| <b>9</b>  | 60.02 | 5.20 | 3.44 |        |       | 60.14      | 4.82 | 3.19  |        |       |
| <b>10</b> | 58.99 | 5.34 |      | 15.01  |       | 59.11      | 5.18 |       | 15.17  |       |
| <b>11</b> | 64.47 | 6.05 |      | 7.88   |       | 64.50      | 6.09 |       | 7.93   |       |
| <b>12</b> | 61.68 | 5.53 |      |        | 15.99 | 61.54      | 5.16 |       |        | 16.22 |
| <b>13</b> | 56.70 | 4.56 |      | 7.03   | 15.23 | 56.51      | 4.33 |       | 7.25   | 15.55 |
| <b>14</b> | 64.86 | 6.26 |      | 7.56   |       | 64.50      | 6.09 |       | 7.93   |       |
| <b>15</b> | 61.55 | 5.32 |      |        | 16.18 | 61.54      | 5.16 |       |        | 16.22 |
| <b>16</b> | 70.46 | 6.20 | 3.19 |        |       | 70.74      | 6.18 | 3.44  |        |       |
| <b>17</b> | 64.39 | 5.12 | 3.26 | 8.22   |       | 64.56      | 5.18 | 3.27  | 8.29   |       |
| <b>18</b> | 68.25 | 5.34 | 3.74 | 9.53   |       | 68.20      | 5.45 | 3.79  | 9.59   |       |
| <b>19</b> | 61.32 | 4.89 | 3.07 |        | 16.65 | 61.20      | 4.69 | 3.10  |        | 16.83 |
| <b>20</b> | 70.43 | 5.79 | 7.01 |        |       | 70.75      | 5.68 | 7.17  |        |       |
| <b>21</b> | 64.33 | 5.61 | 3.28 | 8.22   |       | 64.26      | 5.63 | 3.26  | 8.25   |       |
| <b>22</b> | 61.39 | 4.88 | 3.06 | 16.59  |       | 61.20      | 4.69 | 3.10  | 16.83  |       |
| <b>25</b> | 60.22 | 6.62 | 9.83 |        |       | 60.42      | 6.52 | 10.07 |        |       |

|           |       |      |      |       |          |       |      |      |       |          |
|-----------|-------|------|------|-------|----------|-------|------|------|-------|----------|
| <b>30</b> | 64.50 | 6.18 | 4.08 |       |          | 64.34 | 6.03 | 4.41 |       |          |
| <b>31</b> | 56.92 | 7.80 | 2.16 | 19.16 |          | 57.25 | 7.79 | 2.30 | 19.51 |          |
| <b>32</b> | 46.03 | 4.45 | 3.40 |       | 28.69    | 45.86 | 4.53 | 3.15 |       | 28.50    |
| <b>34</b> | 65.13 | 6.16 | 4.80 |       |          | 65.44 | 6.22 | 5.09 |       |          |
| <b>35</b> | 57.30 | 7.79 | 2.18 | 20.63 |          | 57.27 | 8.01 | 2.47 | 20.96 |          |
| <b>36</b> | 57.02 | 7.74 | 2.49 | 19.38 |          | 57.25 | 7.79 | 2.30 | 19.51 |          |
| <b>41</b> | 58.30 | 4.27 |      | 26.22 |          | 58.34 | 4.20 |      |       | 26.36    |
| <b>42</b> | 73.61 | 5.97 | 5.77 |       |          | 73.99 | 5.77 | 6.16 |       |          |
| <b>43</b> | 54.18 | 6.99 |      | 20.36 | 12.87    | 53.91 | 6.96 |      | 20.49 | 13.12    |
| <b>44</b> | 60.31 | 7.64 | 2.37 | 22.66 |          | 60.25 | 7.97 | 2.70 | 22.90 |          |
| <b>49</b> | 63.42 | 5.80 |      | 12.98 |          | 64.04 | 5.67 |      | 13.26 |          |
| <b>51</b> | 56.17 | 7.67 |      | 20.88 | 6.14(Cl) | 55.99 | 7.77 |      | 21.88 | 6.36(Cl) |
| <b>56</b> | 33.05 | 2.68 | 4.73 |       | 43.01    | 32.79 | 2.75 | 4.78 |       | 43.30    |
| <b>57</b> | 35.00 | 2.30 | 4.82 |       | 46.01    | 34.96 | 2.20 | 5.09 |       | 46.14    |
| <b>58</b> | 37.52 | 2.84 | 4.55 |       | 43.53    | 37.39 | 2.79 | 4.85 |       | 43.90    |
| <b>59</b> | 37.73 | 2.98 | 4.70 |       | 44.01    | 37.39 | 2.79 | 4.85 |       | 43.90    |

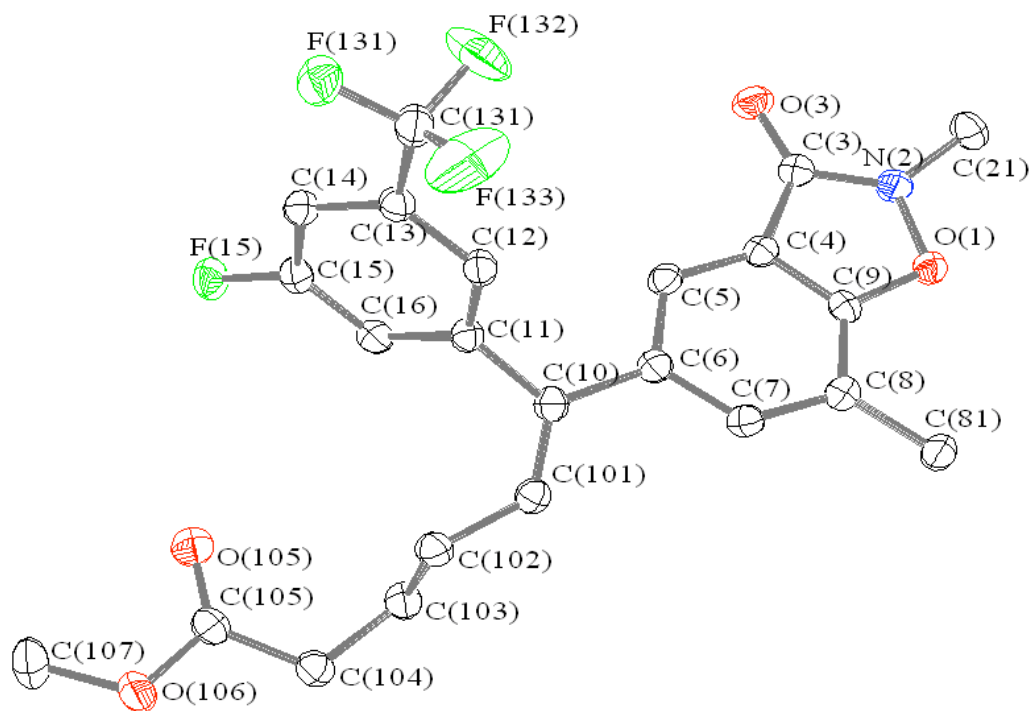

**Figure 1** Structural Diagram of Compound **22**. Hydrogen atoms have been omitted for clarity.

### Crystal Data and Data Collection Parameters for Compound **22**

|                |                       |
|----------------|-----------------------|
| formula        | $C_{23}H_{21}F_4NO_4$ |
| formula weight | 451.42                |
| space group    | P-1 (No. 2)           |
| a, Å           | 8.8822(7)             |
| b, Å           | 9.7444(9)             |
| c, Å           | 12.9675(17)           |
| a, deg         | 76.306(4)             |

|                                        |                                                                       |
|----------------------------------------|-----------------------------------------------------------------------|
| b, deg                                 | 72.480(6)                                                             |
| g, deg                                 | 89.873(5)                                                             |
| V, Å <sup>3</sup>                      | 1036.98(19)                                                           |
| Z                                      | 2                                                                     |
| d <sub>calc</sub> , g cm <sup>-3</sup> | 1.446                                                                 |
| crystal dimensions, mm                 | 0.44x0.29x0.13                                                        |
| temperature, K                         | 150.                                                                  |
| radiation (wavelength, Å )             | Mo K <sub>a</sub> (0.71073)                                           |
| monochromator                          | graphite                                                              |
| linear abs coef, mm <sup>-1</sup>      | 0.115                                                                 |
| absorption correction applied          | empirical                                                             |
| transmission factors: min, max         | 0.94, 0.99                                                            |
| diffractometer                         | Nonius KappaCCD                                                       |
| h, k, l range                          | -11 to 0 -12 to 12 -17 to 15                                          |
| 2θ range, deg                          | 4.31-55.81                                                            |
| mosaicity, deg                         | 0.39                                                                  |
| programs used                          | SHELXTL                                                               |
| F <sub>000</sub>                       | 468.0                                                                 |
| weighting                              |                                                                       |
|                                        | $1/[\sigma^2(F_o^2)+(0.0722P)^2+0.0000P]$ where $P=(F_o^2 +2F_c^2)/3$ |
| data collected                         | 12884                                                                 |
| unique data                            | 4884                                                                  |
| R <sub>int</sub>                       | 0.038                                                                 |

|                                      |                            |
|--------------------------------------|----------------------------|
| data used in refinement              | 4879                       |
| cutoff used in R-factor calculations | $F_o^2 > 2.0\sigma(F_o^2)$ |
| data with $I > 2.0s(I)$              | 3461                       |
| number of variables                  | 292                        |
| largest shift/esd in final cycle     | 0.00                       |
| $R(F_o)$                             | 0.046                      |
| $R_w(F_o^2)$                         | 0.117                      |
| goodness of fit                      | 1.034                      |

### Crystallographic Data for Compound 22

|                               |                                           |
|-------------------------------|-------------------------------------------|
| $C_{23}H_{21}F_4NO_4$         | formula weight 451.42                     |
| $a = 8.8822(7)\text{\AA}$     | space group P-1 (No. 2)                   |
| $b = 9.7444(9)\text{\AA}$     | $T = 150. \text{K}$                       |
| $c = 12.9675(17)\text{\AA}$   | $l = 0.71073\text{\AA}$                   |
| $\alpha = 76.30(4)^\circ$     | $r_{\text{calc}} = 1.446\text{g cm}^{-3}$ |
| $\beta = 72.48(6)^\circ$      | $m = 0.115\text{mm}^{-1}$                 |
| $\gamma = 89.87(5)^\circ$     | transmission coeff = 0.940-0.986          |
| $V = 1036.98(19)\text{\AA}^3$ | $R(F_o)^a = 0.046$                        |
|                               | $R_w(F_o^2)^b = 0.117$                    |

---

<sup>a</sup>  $R = \sum ||F_o| - |F_c|| / \sum |F_o|$  for  $F_o^2 > 2\sigma(F_o^2)$

<sup>b</sup>  $R_w = [\sum w (|F_o^2| - |F_c^2|)^2 / \sum w |F_o^2|^2]^{1/2}$

**Table 2.** Bond Distances in Angstroms for Compound **22**

| <u>Atom 1</u> | <u>Atom 2</u> | <u>Distance</u> | <u>Atom 1</u> | <u>Atom 2</u> | <u>Distance</u> |
|---------------|---------------|-----------------|---------------|---------------|-----------------|
| F(15)         | C(15)         | 1.3569(17)      | C(6)          | C(10)         | 1.491(2)        |
| F(131)        | C(131)        | 1.3244(18)      | C(7)          | C(8)          | 1.384(2)        |
| F(132)        | C(131)        | 1.328(2)        | C(8)          | C(9)          | 1.391(2)        |
| F(133)        | C(131)        | 1.325(2)        | C(8)          | C(81)         | 1.508(2)        |
| O(1)          | C(9)          | 1.3762(18)      | C(10)         | C(101)        | 1.341(2)        |
| O(1)          | N(2)          | 1.4192(16)      | C(10)         | C(11)         | 1.4953(19)      |
| O(3)          | C(3)          | 1.2366(18)      | C(11)         | C(16)         | 1.393(2)        |
| O(105)        | C(105)        | 1.2014(19)      | C(11)         | C(12)         | 1.395(2)        |
| O(106)        | C(105)        | 1.342(2)        | C(12)         | C(13)         | 1.389(2)        |
| O(106)        | C(107)        | 1.444(2)        | C(13)         | C(14)         | 1.390(2)        |
| N(2)          | C(3)          | 1.360(2)        | C(13)         | C(131)        | 1.496(2)        |
| N(2)          | C(21)         | 1.435(2)        | C(14)         | C(15)         | 1.379(2)        |
| C(3)          | C(4)          | 1.460(2)        | C(15)         | C(16)         | 1.378(2)        |
| C(4)          | C(9)          | 1.381(2)        | C(101)        | C(102)        | 1.495(2)        |
| C(4)          | C(5)          | 1.395(2)        | C(102)        | C(103)        | 1.533(2)        |
| C(5)          | C(6)          | 1.397(2)        | C(103)        | C(104)        | 1.522(2)        |
| C(6)          | C(7)          | 1.415(2)        | C(104)        | C(105)        | 1.498(2)        |

-----

Numbers in parentheses are estimated standard deviations in the least significant

digits.

**Table 3.** Bond Angles in Degrees for Compound **22**

| <u>Atom 1</u> | <u>Atom 2</u> | <u>Atom 3</u> | <u>Angle</u> | <u>Atom 1</u> | <u>Atom 2</u> | <u>Atom 3</u> | <u>Angle</u> |
|---------------|---------------|---------------|--------------|---------------|---------------|---------------|--------------|
| C(9)          | O(1)          | N(2)          | 103.74(11)   | C(16)         | C(11)         | C(12)         | 118.71(13)   |
| C(105)        | O(106)        | C(107)        | 117.08(14)   | C(16)         | C(11)         | C(10)         | 120.98(13)   |
| C(3)          | N(2)          | O(1)          | 112.95(13)   | C(12)         | C(11)         | C(10)         | 120.30(13)   |
| C(3)          | N(2)          | C(21)         | 131.58(14)   | C(13)         | C(12)         | C(11)         | 120.40(13)   |
| O(1)          | N(2)          | C(21)         | 114.93(12)   | C(12)         | C(13)         | C(14)         | 121.39(13)   |
| O(3)          | C(3)          | N(2)          | 123.66(15)   | C(12)         | C(13)         | C(131)        | 118.09(13)   |
| O(3)          | C(3)          | C(4)          | 131.74(15)   | C(14)         | C(13)         | C(131)        | 120.50(13)   |
| N(2)          | C(3)          | C(4)          | 104.59(13)   | C(15)         | C(14)         | C(13)         | 116.74(13)   |
| C(9)          | C(4)          | C(5)          | 120.47(14)   | F(15)         | C(15)         | C(16)         | 118.01(13)   |
| C(9)          | C(4)          | C(3)          | 106.62(14)   | F(15)         | C(15)         | C(14)         | 118.41(13)   |
| C(5)          | C(4)          | C(3)          | 132.91(13)   | C(16)         | C(15)         | C(14)         | 123.58(14)   |
| C(4)          | C(5)          | C(6)          | 118.34(13)   | C(15)         | C(16)         | C(11)         | 119.15(13)   |
| C(5)          | C(6)          | C(7)          | 118.48(14)   | C(10)         | C(101)        | C(102)        | 129.24(14)   |
| C(5)          | C(6)          | C(10)         | 121.20(13)   | C(101)        | C(102)        | C(103)        | 110.48(13)   |
| C(7)          | C(6)          | C(10)         | 120.31(14)   | C(104)        | C(103)        | C(102)        | 113.47(14)   |
| C(8)          | C(7)          | C(6)          | 124.41(15)   | C(105)        | C(104)        | C(103)        | 115.15(14)   |
| C(7)          | C(8)          | C(9)          | 114.35(13)   | O(105)        | C(105)        | O(106)        | 123.49(15)   |
| C(7)          | C(8)          | C(81)         | 123.62(14)   | O(105)        | C(105)        | C(104)        | 126.66(15)   |
| C(9)          | C(8)          | C(81)         | 122.02(14)   | O(106)        | C(105)        | C(104)        | 109.84(13)   |



|        |       |       |            |        |        |        |            |
|--------|-------|-------|------------|--------|--------|--------|------------|
| O(1)   | C(9)  | C(4)  | 111.98(13) | F(131) | C(131) | F(133) | 106.81(15) |
| O(1)   | C(9)  | C(8)  | 124.11(13) | F(131) | C(131) | F(132) | 106.04(14) |
| C(4)   | C(9)  | C(8)  | 123.91(15) | F(133) | C(131) | F(132) | 105.48(15) |
| C(101) | C(10) | C(6)  | 120.93(13) | F(131) | C(131) | C(13)  | 113.81(13) |
| C(101) | C(10) | C(11) | 121.54(14) | F(133) | C(131) | C(13)  | 112.69(14) |
| C(6)   | C(10) | C(11) | 117.53(12) | F(132) | C(131) | C(13)  | 111.43(15) |

-----

Numbers in parentheses are estimated standard deviations in the least significant digits.

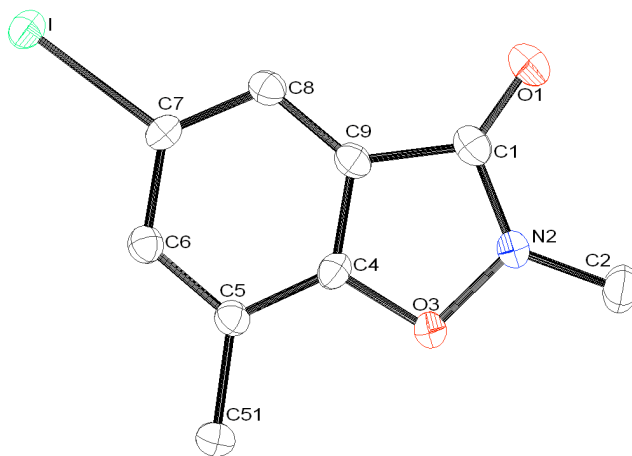

**Figure 2** Structural diagram of compound **58**. Hydrogen atoms have been omitted for clarity.

### Crystallographic Data for Compound 58

|                              |                                                                    |
|------------------------------|--------------------------------------------------------------------|
| Formula                      | C <sub>9</sub> H <sub>8</sub> INO <sub>2</sub>                     |
| Weight                       | 289.07                                                             |
| a = 4.1515(5)Å               | space group P2 <sub>1</sub> /c (No. 14)                            |
| b = 16.0162(12)Å             | T = 150. K                                                         |
| c = 14.1406(11)Å             | l = 0.71073Å                                                       |
| β = 97.41(5)°                | r <sub>calc</sub> = 2.059g cm <sup>-3</sup>                        |
| V = 932.37(15)Å <sup>3</sup> | m = 3.361mm <sup>-1</sup>                                          |
|                              | transmission coeff = 0.623-0.715                                   |
|                              | R(F <sub>o</sub> ) <sup>a</sup> = 0.029                            |
|                              | R <sub>w</sub> (F <sub>o</sub> <sup>2</sup> ) <sup>b</sup> = 0.071 |

$$^a R = \sum ||F_o| - |F_c|| / \sum |F_o| \text{ for } F_o^2 > 2s(F_o^2)$$

$$^b R_w = [\sum w (|F_o^2| - |F_c^2|)^2 / \sum w |F_o^2|^2]^{1/2}$$

**Table 4.** Bond Angles in Degrees for Compound 58

| <u>Atom 1</u> | <u>Atom 2</u> | <u>Atom 3</u> | <u>Angle</u> | <u>Atom 1</u> | <u>Atom 2</u> | <u>Atom 3</u> | <u>Angle</u> |
|---------------|---------------|---------------|--------------|---------------|---------------|---------------|--------------|
| C(4)          | O(3)          | N(2)          | 103.8(2)     | C(4)          | C(5)          | C(51)         | 122.9(3)     |
| C(1)          | N(2)          | O(3)          | 113.1(3)     | C(6)          | C(5)          | C(51)         | 122.7(3)     |
| C(1)          | N(2)          | C(2)          | 130.7(3)     | C(7)          | C(6)          | C(5)          | 121.5(3)     |
| O(3)          | N(2)          | C(2)          | 114.7(3)     | C(8)          | C(7)          | C(6)          | 122.5(3)     |
| O(1)          | C(1)          | N(2)          | 123.9(3)     | C(8)          | C(7)          | I             | 119.5(2)     |

|      |      |      |          |      |      |      |          |
|------|------|------|----------|------|------|------|----------|
| O(1) | C(1) | C(9) | 132.1(4) | C(6) | C(7) | I    | 118.0(2) |
| N(2) | C(1) | C(9) | 104.0(3) | C(9) | C(8) | C(7) | 116.1(3) |
| C(9) | C(4) | C(5) | 124.6(3) | C(4) | C(9) | C(8) | 120.9(3) |
| C(9) | C(4) | O(3) | 112.2(3) | C(4) | C(9) | C(1) | 106.8(3) |
| C(5) | C(4) | O(3) | 123.2(3) | C(8) | C(9) | C(1) | 132.3(3) |
| C(4) | C(5) | C(6) | 114.4(3) |      |      |      |          |

-----

Numbers in parentheses are estimated standard deviations in the least significant digits.

**Table 5.** Bond Distances in Angstroms for Compound **58**

| <u>Atom 1</u> | <u>Atom 2</u> | <u>Distance</u> | <u>Atom 1</u> | <u>Atom 2</u> | <u>Distance</u> |
|---------------|---------------|-----------------|---------------|---------------|-----------------|
| I             | C(7)          | 2.100(3)        | C(4)          | C(9)          | 1.378(4)        |
| O(1)          | C(1)          | 1.218(4)        | C(4)          | C(5)          | 1.382(4)        |
| O(3)          | C(4)          | 1.382(4)        | C(5)          | C(6)          | 1.399(5)        |
| O(3)          | N(2)          | 1.420(3)        | C(5)          | C(51)         | 1.506(4)        |
| N(2)          | C(1)          | 1.371(5)        | C(6)          | C(7)          | 1.399(5)        |
| N(2)          | C(2)          | 1.427(5)        | C(7)          | C(8)          | 1.384(4)        |
| C(1)          | C(9)          | 1.475(4)        | C(8)          | C(9)          | 1.382(5)        |

-----

Numbers in parentheses are estimated standard deviations in the least significant digits.
